1 **A winner in the Anthropocene: changing host plant**  
2 **distribution explains geographic range expansion in the gulf**  
3 **fritillary butterfly**

4

5 Christopher A. Halsch<sup>1</sup>, Arthur M. Shapiro<sup>2</sup>, James H. Thorne<sup>3</sup>,  
6 David P. Waetjen<sup>3</sup>, and Matthew L. Forister<sup>1</sup>

7

8 <sup>1</sup>Department of Biology, Program in Ecology, Evolution and  
9 Conservation Biology, University of Nevada, Reno, NV, U.S.A.

10 <sup>2</sup>Department of Environmental Science and Policy and Center for  
11 Population Biology, University of California, Davis, CA, U.S.A.

12 <sup>3</sup>Department of Environmental Science and Policy, University of  
13 California, Davis, CA, U.S.A.

14

15 Corresponding author

16 Christopher Halsch

17 (415) 246-9157

18 Mail Stop 314, University of Nevada Reno, 1664 N Virginia

19 Street, Reno, NV 89557

20 [cahalsch@nevada.unr.edu](mailto:cahalsch@nevada.unr.edu)

## 2 Christopher A. Halsch et al.

### 21 **Abstract:**

- 22 1. The changing climate is altering the geographic distributions  
23 of species around the world with consequences for population  
24 dynamics, resulting in winners and losers in the  
25 Anthropocene.
- 26 2. *Agraulis vanillae*, the gulf fritillary butterfly, has expanded its  
27 range in the past one hundred years in the western United  
28 States. We combine time series analysis with species  
29 distribution modeling to investigate factors limiting the  
30 distribution of *A. vanillae* and to predict future shifts under  
31 warming scenarios.
- 32 3. In the western US, where we have time series and geographic  
33 data, urban development has a positive influence (the host  
34 plant is an ornamental in gardens), being associated with year  
35 of colonization. Colonization was also associated to a lesser  
36 extent with winter maximum temperatures, while a negative  
37 impact of minimum temperatures and precipitation was  
38 apparent on population growth rates.
- 39 4. Across the country, the butterfly is primarily limited by host  
40 availability and positively affected by human presence.  
41 Perhaps counter-intuitively for a largely tropical ectotherm,  
42 current effects of a warming climate (in the years post-  
43 colonization) are either negative (on population growth rate)  
44 or indirect, likely mediated through availability of areas that  
45 can support the host.

46 5. Under future climate scenarios, conditions are predicted to  
47 become more suitable for *Passiflora* in many urban areas,  
48 which would likely result in further expansion of *A. vanillae*  
49 during the dispersive season. These results illustrate the value  
50 of combining time series with spatial modeling to understand  
51 and predict shifting geographic ranges in the Anthropocene.

52 **Keywords:** *Agraulis vanillae*, *Passiflora*, climate change,  
53 expansion, distribution

#### 4 Christopher A. Halsch et al.

##### 54 **Introduction**

55

56 Recent climate change has had numerous consequences for

57 species around the world, including shifts in geographic

58 distribution (Chen et al., 2011). In some cases, ranges are

59 expanding, while for many others geographic ranges are shifting

60 or contracting (Parmesan, 2006). Ectotherms, including

61 butterflies and other insects, are particularly sensitive to changes

62 in the climate and have often been exemplar species for the study

63 of these issues (Parmesan et al., 1999; Warren et al., 2001).

64 Recently, attention has been paid not only to changes in

65 geographic ranges, but also to declines in insect populations

66 around the world, which are driven by a combination of habitat

67 loss, pesticide use, climate change, and other factors (Hallmann et

68 al., 2017; Lister & Garcia, 2018; Salcido et al., 2019; Sanchez-

69 Bayo & Wyckhuys, 2019; Wepprich et al., 2019). We can expect

70 these factors will have different impacts on different species, and

71 even that some species will be "winners" under altered conditions

72 (McKinney & Lockwood, 1999). Identifying successful species

73 and the reason for their success in the face of change is important

74 for understanding the potential of individual species and

75 ecosystems to persist and thrive in future climates. In particular,

76 understanding how aspects of global change negatively impact

77 some species, while benefiting others, will improve our ability to

78 predict future species assemblages. One example of a butterfly

79 that appears to be benefitting from anthropogenic influence is the

80 gulf fritillary (*Agraulis vanillae*), which has recently expanded its

81 range in the western United States (Shapiro, 2007). In this study  
82 we seek to better understand the drivers underlying this expansion  
83 using a combination of spatial data and long-term population  
84 records.

85 *Agraulis vanillae* is a neotropical butterfly associated with  
86 riparian and weedy/disturbed habitats (Shapiro, 2009). Over its  
87 entire distribution, from temperate North America to temperate  
88 South America, there are eight identified sub-species. Previous  
89 work has demonstrated genetic divergence between North  
90 American and South American lineages (Runquist et al., 2012).  
91 In the United States, *A. vanillae* is multi-voltine and in some areas  
92 flies almost all year, however diapause has been observed in both  
93 the larval and pupal stages in Florida (Sourakov, 2008). The  
94 butterfly is sensitive to frost, which can be lethal to all life stages  
95 (Shapiro, 2007). Eastern populations are known to undergo  
96 northward dispersal in the spring (Walker, 1991), with sightings  
97 as far north as North Dakota and New York (Scott, 1986). These  
98 life history traits raise the possibility that the range of *A. vanillae*  
99 may be limited by low overwintering temperatures, thus milder  
100 winters could reduce the risk of extinction along the northern  
101 range margin and explain the success of this butterfly.

102 *Agraulis vanillae* utilizes most plants from the genus  
103 *Passiflora* as hosts (May, 1992). The two most common species  
104 in the United States are *Passiflora incarnata* and *Passiflora lutea*,  
105 both of which are found across much of the southeastern United  
106 States (Gremillion, 1989). *Passiflora* prefers well-drained soils

6 Christopher A. Halsch et al.

107 and is often found in disturbed sites. In the west, *Passiflora* is not  
108 present in natural areas, however various species have been  
109 introduced to urban areas as ornamentals (Graves & Shapiro,  
110 2003). Winter low temperatures likely limit the distributions of  
111 wild populations, however survival can be improved by active  
112 management in cultivated populations (McGuire, 1999). In  
113 California, the introduction of *Passiflora* and its association with  
114 *A. vanillae*, are well documented. In Southern California, these  
115 species have been associated since 1875. It was first sighted in  
116 San Francisco as early as 1908, however it did not permanently  
117 establish until 1955 (Powell, 2000). In the 1960's and 1970's the  
118 butterfly was seen in Sacramento, but was extirpated and has only  
119 recently reestablished in the region. The presence of *Passiflora*  
120 offers another, non-mutually exclusive, explanation for the  
121 success of *A. vanillae*. It is possible that *A. vanillae* is currently  
122 not limited by temperature, but instead by the distribution of  
123 *Passiflora*. As this plant expands due to cultivation, so does the  
124 gulf fritillary.

125 In this study, we address the following questions. First, using  
126 data from a long-term observational study, we ask if climate or  
127 urban development better explain the establishment and success of  
128 the butterfly in recent years in the Sacramento Valley. Second,  
129 using citizen science observational data, we ask if the current  
130 distribution of the butterfly in the continental United States is  
131 better explained by host plant or climate limitation. Finally, using  
132 species distribution modeling, we ask if the butterfly is likely to

133 continue to expand its distribution under different climate change  
134 scenarios.

## 135 **Materials and methods**

### 136 *Sacramento Valley time series data*

137 Observational data were collected every other week by a single  
138 observer (AMS) across five sites in the Sacramento Valley. Count  
139 data of individual butterflies at these five sites have been collected  
140 since 1999 and presence/absence data have been collected since  
141 the 1970's or 1980's, depending on the site. At these five low  
142 elevation sites, data are recorded year round. Site descriptions  
143 and additional details have been reported elsewhere (Forister et  
144 al., 2010). *Agraulis vanillae* did not consistently appear at any of  
145 these five sites until 2001 and did not appear at every site until  
146 2012. Climate data in California were derived from 270m grid  
147 climate maps of monthly and annual values for minimum and  
148 maximum temperature and precipitation (Flint & Flint 2012; Flint  
149 et al. 2013; Thorne et al. 2015). We extracted the values for grid  
150 cells that overlapped with each of the sample sites in the  
151 Sacramento Valley and averaged the values for each monthly  
152 variable for each year. We calculated seasonal variables by further  
153 averaging monthly values to season and converting to water year  
154 (the start of September through the end of August).

### 155 *Sacramento Valley statistical analysis*

156 We approached the analysis of times series data in two phases.  
157 First, we used annual presence/absence data to examine

8 *Christopher A. Halsch et al.*

158 colonization, attempting to model the difference between years in  
159 which the butterfly was absent across our focal sites and years in  
160 which it was present (spanning 1984 through 2018). Specifically,  
161 random forest regression was used with presence at a site in a  
162 given year as the response variable and percent urban land cover  
163 (at a county level), seasonal means of minimum temperature,  
164 seasonal means of maximum temperature, and seasonal means of  
165 precipitation as covariates. A total of 500,000 trees were made  
166 with a node size of 5. Variable importance was determined by  
167 examining the increased mean squared error of the model when  
168 each variable was randomly permuted. The most influential  
169 variables identified by random forest analysis were moved  
170 forward into a Bayesian hierarchical model. While the random  
171 forest is useful for judging the potential importance of a large  
172 number of variables, including some that are highly correlated, the  
173 Bayesian model allows us to estimate coefficients and associated  
174 uncertainty in a hierarchical framework (simultaneously within  
175 and across sites). Following a previous model used for data from  
176 these study sites (Nice et al, 2019), presence was modeled both at  
177 the individual site level and at a higher level across all sites using  
178 a Bernoulli distribution. Uninformative priors were used for  
179 means and variance, with means drawn from normal distribution  
180 ( $\mu = 0$ ,  $\tau = 0.01$ ) and variances drawn from a gamma  
181 distribution ( $r = 0.01$ ,  $\lambda = 0.01$ ). The Bayesian model was  
182 comprised of four chains each run for 5,000,000 iterations with an  
183 adaptive phase of 500,000 iterations.



184 As a second phase, we examined annual population dynamics  
185 post-colonization at the same focal sites, using individual survey  
186 count data summarized by year and transformed into population  
187 growth rates. Population growth was calculated as the natural log  
188 of the current year's total count divided by the previous year's  
189 total count (Sibly & Hone, 2002). To determine the most  
190 influential climate variables, population growth in a given year  
191 was then modeled using a random forest regression. Covariates in  
192 the model included abundance in the previous year, seasonal  
193 means of minimum monthly temperature, seasonal means of  
194 maximum monthly temperature, seasonal means of precipitation,  
195 and these same variables lagged by one year to allow in particular  
196 for effects mediated through host plants. Again, a total of 500,000  
197 trees with a node size of 5 was used. Variable importance was  
198 determined by examining the increased mean squared error of the  
199 model following permutation of each variable, and this was done  
200 both within and among sites. Like the colonization analysis, the  
201 most influential variables identified by random forest analysis  
202 were moved forward into a Bayesian hierarchical model in which  
203 population growth was modeled both at the individual site level  
204 and at a higher level across all sites using a normal distribution.  
205 Means of covariates were drawn from an uninformed normal  
206 distribution ( $\mu = 0$ ,  $\tau = 0.01$ ) and variances drawn from an  
207 uninformed gamma distribution ( $r = 0.01$ ,  $\lambda = 0.01$ ). This  
208 model was comprised of four chains each run for 100,000  
209 iterations with an adaptive phase of 10,000 iterations. All

10 *Christopher A. Halsch et al.*

210 analyses were conducted using the randomForest (RColorBrewer  
211 & Liaw, 2018) and jagsUI (Kellner, 2019) packages in R Studio.

212 *National data*

213 For US-wide spatial analyses, geo-referenced data points for  
214 both *A. vanillae* and *Passiflora* were acquired from “research  
215 grade” observations on inaturalist. Additional observations of  
216 *Passiflora* were obtained from Cal flora and additional  
217 observations of *A. vanillae* from the Butterflies and Moths of  
218 North America. Only observations with an uncertainty under 1km  
219 were used for analysis. Both *Passiflora* and *A. vanillae* are  
220 distinct and identification is likely not a concern, however a  
221 random subset of 100 observations with photos were checked and  
222 all were found to be correct IDs. Current climate data and future  
223 projections were obtained from WorldClim (Hijmans et al., 2005).  
224 A human population density raster was obtained from the  
225 Socioeconomic Data and Applications Center, which used data  
226 from the 2010 census (Center for International Earth Science  
227 Information Network, 2018). All raster layers were cropped to  
228 only include the 48 contiguous states, although *A. vanillae* is also  
229 an exotic in Hawaii. Finally, *A. vanillae* points were separated  
230 based on being from the dispersal season or before. Points from  
231 January to March were labeled as pre-dispersal, which is earlier  
232 than the earliest observed spring migrant from a study of this  
233 movement in Florida (Walker, 1991). In this paper, dispersal will  
234 refer to the maximum distribution that the butterfly achieves  
235 during the year.

236 *National statistical analysis*

237 Species distribution models were built for both *Passiflora* and  
238 *Agraulis vanillae*. All host plant models were built at the genus  
239 level, however *Passiflora* species known not to be host plants  
240 were excluded. The western and eastern distributions were  
241 modeled both separately and together, to allow for the possibility  
242 of different factors affecting range limits in the different regions.  
243 For all models, we used the maxent algorithm, which models  
244 presence only data by comparing observations with random  
245 background points. For every model, 10,000 random background  
246 points were taken within the continental United States. *Passiflora*  
247 was modeled using temperature, mean precipitation, and human  
248 population density as covariates. Models were built and evaluated  
249 using mean temperature in the coldest month, mean annual  
250 temperature, and max temperature in the warmest month as the  
251 temperature variables. The best performing host plant model was  
252 later used as part of the butterfly spatial model. Since the host  
253 plant, especially in the western United States, is found almost  
254 exclusively in urban environments, human population density was  
255 used as a proxy for urban cultivation of the plant. For *A. vanillae*,  
256 both the overwintering distribution and dispersal distributions  
257 were modeled. The overwintering distribution was modeled using  
258 the *Passiflora* distribution model and temperature variables. The  
259 dispersal distribution was similarly modeled using the *Passiflora*  
260 distribution model and temperature as covariates. As with  
261 *Passiflora* analyses, various temperature variables were used for

## 12 *Christopher A. Halsch et al.*

262 model building and comparison, and only the highest performing  
263 model for both overwinter and dispersal distributions were used  
264 for inference and projection. The models were trained on 70% of  
265 the data and tested with the remaining 30%. For all models, data  
266 were thinned in order to reduce overfitting due to sampling bias,  
267 which was done by creating a grid that was overlaid onto the  
268 study area. Individual grid cells were approximately 50 km<sup>2</sup> and  
269 if more than five observations were located within a single grid,  
270 only a random subset of five was kept for analysis. If a grid cell  
271 had less than five observations all were kept. A sensitivity  
272 analysis was also performed to examine the impacts of the  
273 thinning method. All data used in models were thinned  
274 substantially, often by over fifty percent (Table S1). Model  
275 evaluation was performed by examining the AUC scores and  
276 omission error rates of both the real model and 1000 permuted  
277 null models. Methods and code for null model permutation are  
278 described by Bohl et al. (2019), but briefly, observations from the  
279 real model are randomly moved around the study area and  
280 compared to the real model using the same covariates and testing  
281 data. All analyses were performed in R Studio using the *dismo*  
282 package (Hijmans et al., 2013).

## 283 **Results**

### 284 *Time Series*

285 For the first twenty-five years of the time series, *Agraulis vanillae*  
286 only appeared as an occasional visitor, however beginning in 2001  
287 it became a frequent visitor to all sites across the Sacramento

288 Valley. This rise in the presence of *A. vanillae* occurred during a  
289 time of rising temperature and increasing urban development in  
290 the area (fig. 1). The random forest model attributed high  
291 importance to winter maximum temperatures and percent urban  
292 land cover in predicting presence at a site (fig. 2). Both maximum  
293 temperature and urban land cover have increasing trends over  
294 time, especially land cover, which is highly correlated with year  
295 (correlation coefficients for year and land cover range from 0.973  
296 in Solano county to 0.989 in Yolo county). For the Bayesian  
297 model, the model successfully converged (as judged by visual  
298 inspection of posterior probability distributions) at both the  
299 individual site level and at the higher across site level. The  
300 Bayesian model confirms that both maximum winter temperatures  
301 and development are positively associated with colonization at the  
302 higher across site level. Specifically, the probability that  
303 maximum temperature has a greater than zero effect is 0.98 and  
304 the probability that urban development has a greater than zero  
305 effect is 0.88. The coefficient estimate for urban development  
306 shows high uncertainty for any particular value, however the  
307 posterior distribution is almost entirely greater than the maximum  
308 temperature posterior, thus there is support for a stronger effect of  
309 urbanization.

310 For annual population dynamics (represented by the natural log  
311 of the current to previous population density), the random forest  
312 analysis attributed high importance to abundance in the previous  
313 year, winter minimum temperature in the current year, winter

14 *Christopher A. Halsch et al.*

314 precipitation in the current year, and summer precipitation in the  
315 current year for predicting population growth (fig. 2, fig. S1).  
316 Urbanization, while one of the covariates in the model, was not  
317 found to be important for population growth rates. Coefficients in  
318 the Bayesian model for population growth converged at both the  
319 across site and individual site level. Previous year's abundance,  
320 winter minimum temperature, and winter precipitation all had  
321 negative effects on population growth. The model is confident in  
322 the negative impacts of previous year's abundance, winter  
323 minimum temperature, and winter precipitation (fig. 3).  
324 Specifically, the probability that previous year's abundance has a  
325 negative effect is 0.84, the probability that winter minimum  
326 temperature has a negative effect is 0.80, and the probability that  
327 winter precipitation has an effect is 0.88. There does not appear  
328 to be a strong effect of summer precipitation in the Bayesian  
329 hierarchical regression, despite the importance attributed to it in  
330 the random forest. All three variables have approximately equal  
331 estimated effect sizes. At the individual site level, there is  
332 variation in estimated effects, however negative density  
333 dependence is observed at all sites. Winter climate is also  
334 important at all sites, however some sites have higher estimated  
335 impacts of winter precipitation while others more heavily weight  
336 winter minimum temperatures (fig. S4).

337 *Species Distribution Models*

338 Overall, the geographic distribution of *Passiflora* is best  
339 predicted by mean annual temperature and human population

340 density, with the former being the most important variable (Table  
341 S2, Table 1). When examining regions (eastern and western US)  
342 separately, urban density is a more important predictor in the  
343 west, while minimum temperature is more important in the east  
344 (Table 1). All models, both combined and regional, achieved high  
345 AUC values and performed exceptionally well when compared to  
346 permuted null models (Table 1, fig. S5). Under the RCP 4.5 and  
347 8.5 scenarios, suitable habitat along *Passiflora*'s, northern range  
348 boundary is predicted to expand. The expansion is especially  
349 strong in urban areas, with much of the urban mid-Atlantic and  
350 Northwest predicted to become more suitable (fig. 4 a,b; fig. S6  
351 a,b).

352 The current overwintering range of *A. vanillae* is primarily in  
353 Florida and Texas, and is best explained by both *Passiflora* and  
354 winter temperature lows, as can be seen in the best-performing  
355 model with minimum temperature (Table S2). Like the host plant  
356 model, all models performed well in regards to AUC scores and in  
357 comparison to permuted null models (Table 1, fig. S5). The  
358 importance of minimum temperature in the east is greater,  
359 however in both regions host plant is more important, although it  
360 is not clear if the differences in variable importance between the  
361 east and west are meaningful given different sample sizes in the  
362 two areas (Table 1). Future climate scenarios project a slight  
363 increase in the suitability of some areas in the southeast for  
364 overwintering, but not a major expansion into new urban areas  
365 (fig. 4 c,d). The results from the models of dispersal distribution

16 *Christopher A. Halsch et al.*

366 tell a different story. Models for dispersal range using different  
367 temperature variables all performed equally well, with little  
368 importance being attributed to any temperature variable in any  
369 model (Table S2). Again, models performed well using both the  
370 AUC metric and permuted null model comparison (Table 1, fig.  
371 S5). The dispersal range of the butterfly is almost entirely limited  
372 by the host plant (Table 1). This is reflected in the fact that  
373 models predict expansion in areas that closely match areas of  
374 *Passiflora* expansion (fig. 4 e,f). Thus while overwintering gains  
375 appear marginal under future warming, expansion of the range  
376 during dispersal in the summer is potentially substantial.  
377 Projections under RCP 8.5 show a slightly greater expansion,  
378 however do not dramatically vary from RCP 4.5 predictions (fig.  
379 S6 e,f).

380 **Discussion**

381 Species are currently encountering novel biotic and abiotic  
382 conditions, which can positively or negatively impact population  
383 dynamics and geographic distributions (McKinney & Lockwood,  
384 1999). Building models that parse these various stressors furthers  
385 our understanding of these impacts and allows for better  
386 prediction of future assemblages. In this study, we found that  
387 years in which the butterfly had colonized our focal sites were  
388 characterized by warmer winter maximum monthly temperatures,  
389 while winter minimum temperatures had a negative impact on  
390 population growth rates in the years after colonization. In  
391 particular, if the previous winter was cooler and drier the butterfly



392 was found in higher abundance the next year. It is possible that  
393 the negative impact of winter climate on *A. vanillae* that we have  
394 observed is mediated through interactions with host plants or other  
395 insects. It could be the case that warmer and wetter winters  
396 negatively impact *Passiflora*, but another and perhaps more likely  
397 explanation is that wetter and warmer winters increases parasitoid  
398 pressure and/or disease leading to reduced adult emergence the  
399 following year (Harvell et al., 2002; Stireman et al., 2005).  
400 Additionally, *A. vanillae* is known to host nucleopolyhedrovirus  
401 (Rodriguez et al., 2011), which could be one mechanism that  
402 generated the observed negative density dependence (fig. S1),  
403 however this is not known to impact California populations.  
404 Finally, at our focal sites there is a slight positive trend over time  
405 in winter precipitation and winter minimum temperature (fig. S7),  
406 suggesting that if anything the butterfly is persisting and  
407 expanding in the Sacramento Valley despite of climate, not  
408 because of it.

409 The local impact of climate on the population dynamics of  
410 *Agraulis vanillae* in the Sacramento Valley also has implications  
411 for explaining the limiting factors for its current distribution in the  
412 west. The western United States species distribution model places  
413 almost all of the variable importance on the distribution of the  
414 host plant. One explanation for the recent colonization of the area  
415 by the butterfly is thus the increasing urbanization of the  
416 Sacramento Valley. Over the past twenty years the suburbs of  
417 Sacramento have expanded at a steady rate (Forister et al., 2010),

18 *Christopher A. Halsch et al.*

418 which has likely resulted in an increase in *Passiflora* in the region.  
419 Random forest analysis ranked urban land cover over climate  
420 when predicting colonization and the Bayesian model found a  
421 much greater effect of urbanization (fig. 2a; fig. 3). In the eastern  
422 United States, the impacts of temperature, specifically minimum  
423 temperatures, are apparent in geographic distribution models. In  
424 the east, the distribution of *Passiflora* extends further north in the  
425 winter compared to *A. vanillae*, while in the west the  
426 overwintering distribution closely resembles that of *Passiflora*.  
427 Once the weather warms in the east, the butterflies can then  
428 expand to cover the distribution of the host plant. Thus, while  
429 minimum temperature plays an important role in the  
430 overwintering locations of the eastern gulf fritillary, its maximum  
431 extent appears to be host plant limited in both the eastern and  
432 western United States.

433 By understanding these current limits on *A. vanillae*, it is clear  
434 that any major expansion in geographic distribution will be the  
435 result of a host plant expansion. Models using the RCP 4.5 and  
436 8.5 climate scenarios both predict geographic expansion for the  
437 host plant, and thus an expanding dispersal distribution for the  
438 butterfly. In particular, the host is predicted to have a greater  
439 presence in urban areas on both the east and west coasts,  
440 presumably through more frequent plantings into gardens that will  
441 become more suitable to the plant over time in a warming climate.  
442 If this occurs, the dispersal distribution of *A. vanillae* will also  
443 expand, as the butterfly currently tracks *Passiflora* very

444 successfully. Dispersal ability may be an issue in the Pacific  
445 northwest, as major metropolitan areas are further apart, however  
446 given how far the butterfly currently disperses in the east each  
447 summer, it is likely this area will also be included in its  
448 distribution. Increasing temperatures may also impact the  
449 overwintering distribution of the butterfly, but given the impact of  
450 minimum temperature from the temporal analysis and the lack of  
451 major shifts from the SDM projections, this is much more  
452 uncertain. Although the full distribution of the butterfly does not  
453 appear to be directly limited by temperature, there is an indirect  
454 effect mediated by its host plant, which is limited by temperature.  
455 Projected rising temperatures will still have a major impact on the  
456 distribution of this butterfly through this indirect interaction.

457 Thus far, this butterfly is a notable example of a “winner” in  
458 the Anthropocene. While insect declines are occurring on a large  
459 scale (Hallmann et al., 2017; Lister & Garcia, 2018; Salcido et al.,  
460 2019; Sanchez-Bayo & Wyckhuys, 2019; Wepprich et al., 2019),  
461 altered conditions create opportunities for some insects to prevail.  
462 The intricacies of each success story are different; but an  
463 overarching theme of increasing temperature is playing a vital role  
464 in facilitating the distributional expansion of many of these insect  
465 winners. This has occurred directly by increasing the  
466 overwintering survival along a northern range margin for some  
467 species (Streifel et al., 2017), by increasing access to food  
468 resources for others (Raffa et al., 2013), or by increasing diet  
469 breadth (Pateman et al., 2012). In the case of the gulf fritillary,

20 *Christopher A. Halsch et al.*

470 expansion has thus far been driven by human-mediated host plant  
471 propagation and future warming will allow this process to  
472 continue further north in the United States. While not all insect  
473 expansions will be due to temperature, ectotherms continue to be  
474 prime candidates for temperature driven distributional change, for  
475 better or for worse. Continuing to observe these phenomena and  
476 developing methods by which to understand them is critical. Here  
477 the combination of long-term time series data and large-scale  
478 citizen science spatial data allowed for a detailed examination of  
479 the underlying causes for such an expansion. As these types of  
480 data continue to become more widely accessible, the common  
481 themes behind insect distributional change in the Anthropocene  
482 will continue to become more apparent.

483

484 **Acknowledgements**

485 We thank Ken Nussear for discussion about the distribution  
486 models and code for spatial thinning. Data were provided by the  
487 Butterfly and Moth Information Network and the many  
488 participants who contribute to its Butterflies and Moths of North  
489 America project. Data were also provided by iNaturalist and  
490 Calflora. MLF was supported by a Trevor James McMinn  
491 professorship.

492

493 **Contribution of authors**

494 A.M.S. collected the Sacramento Valley observational data.  
495 J.H.T. and D.P.W. provided the climate data. C.A.H. conducted  
496 the statistical analyses. C.A.H. and M.L.F. wrote the manuscript  
497 with input from co-authors.

498

499 **References**

500 Bohl, C.L., Kass, J.M. & Anderson, R.P. (2019) A new null model  
501 approach to quantify performance and significance for ecological  
502 niche models of species distributions. *Journal of Biogeography*,  
503 **46**, 1101-1111.

504 Calflora: Information on California plants for education, research  
505 and conservation.

506 [web application] (2014) Berkeley, California: The Calflora  
507 Database [a non-profit organization].

508 Available: <https://www.calflora.org/> (Accessed: May 1, 2019).

509

510 Center for International Earth Science Information Network –  
511 CIESIN – Columbia University. (2018) Gridded Population of the  
512 World, Version 4 (GPWv4): Population Density, Revision 11.  
513 Palisades, NY: NASA Socioeconomic Data and Application  
514 Center (SEDAC). <https://doi.org/10.7927/H49C6VHW>. (Accessed  
515 May 5, 2019),

516

517 Chen, I.C., Hill, J.K., Ohlemuller, R., Roy, D.B. & Thomas, C.D.  
518 (2011) Rapid Range Shifts of Species Associated with High  
519 Levels of Climate Warming. *Science*, **333**, 1024-1026.

520 Flint, L. E., & Flint, A.L. (2012) Downscaling future climate  
521 scenarios to fine scales for hydrologic and ecological modeling  
522 and analysis. *Ecological Processes* 1:1-15.

523 Flint, L. E., Flint A.L., Thorne J. H. & Boynton, R. (2013) Fine-  
524 scale hydrologic modeling for regional landscape applications: the  
525 California Basin Characterization Model development and  
526 performance. *Ecological Processes* 2:1-21.

22 Christopher A. Halsch et al.

- 527 Forister, M.L., McCall, A.C., Sanders, N.J., Fordyce, J.A.,  
528 Thorne, J.H., O'Brien, J., Waetjen, D.P. & Shapiro, A.M. (2010)  
529 Compounded effects of climate change and habitat alteration shift  
530 patterns of butterfly diversity. *Proceedings of the National  
531 Academy of Sciences*, **107**, 2088-2092.
- 532 Graves, S.D. & Shapiro, A.M. (2003) Exotics as host plants of the  
533 California butterfly fauna. *Biological Conservation*, **110**, 413-433.
- 534 Gremillion, K.J. The Development of a mutualistic relationship  
535 between humans and maypops (*Passiflora incarnata* L.) in the  
536 Southeastern United States. *Journal of Ethnobiology*, **9**, 135-155.
- 537 Hallmann, C.A., Sorg, M., Jongejans, E., Siepel, H., Hofland, N.,  
538 Schwan, H., Stenmans, W., Muller, A., Surnser, H., Horren, T.,  
539 Goulson, D. & de Kroon, H. (2017) More than 75 percent decline  
540 over 27 years in total flying insect biomass in protected areas.  
541 *PLoS One*, **12**, e0185809.  
542
- 543 Harvell, C.D., Mitchell, C.E., Ward, J.R., Altizer, S., Dobson,  
544 A.P., Ostfeld, R.S. & Samuel, M.D. (2002) Climate Warming and  
545 Disease Risks for Terrestrial and Marine Biota. *Science*, **296**,  
546 2158 – 2162.  
547
- 548 Hijmans, R.J., Cameron, S.E., Parra, J.L., Jones, P.G. & Jarvis, A.  
549 (2005) Very high resolution interpolated climate surfaces for  
550 global land areas. *International Journal of Climatology* **25**: 1965-  
551 1978.  
552
- 553 Hijmans, R.J., Phillips, S., Leathwick, J. & Elith, J. (2013) dismo:  
554 Species distribution modeling. *R package version 0.8-17*.  
555
- 556 iNaturalist. Available from <https://www.inaturalist.org>. Accessed  
557 [2019-05-01].
- 558 Kellner, K. (2019) jagsUI: A Wrapper Around 'rjags' to  
559 Streamline 'JAGS' Analyses. *R package version 1.5.1*.  
560
- 561 Lister, B.C. & Garcia, A. (2018) Climate-driven declines in  
562 arthropod abundance restructure a rainforest food web.  
563 *Proceedings of the National Academy of Sciences*, **115**, 10397-  
564 10406.  
565
- 566 Lotts, K. & Naberhaus, T coordinators. (2017) Butterflies and  
567 Moths of North America. Data set accessed (or exported) 2019-  
568 06-13 at <http://www.butterfliesandmoths.org/>.  
569
- 570 May, P.G. (1992) Flower Selection and the Dynamics of Lipid  
571 Reserve in Two Nectarivorous Butterflies. *Ecology*, **73**, 2181-  
572 2191.
- 573 McGuire, M. (1999) *Passiflora incarnata* (Passifloraceae): A New  
574 Fruit Crop. *Economic Botany*, **53**, 161-167.

- 575 McKinney M.L. & Lockwood J.L. (1999) Biotic homogenization:  
576 a few winners replacing many losers in the next mass extinction.  
577 *Trends in Ecology and Evolution*, **14**, 450-453.
- 578 Nice, C.C., Forister, M.L., Harrison, J.G., Gompert, Z., Fordyce,  
579 J.A., Thorne, J.H., Waetjen, D.P. & Shapiro, A.M. (2019)  
580 Extreme heterogeneity of population response to climatic  
581 variation and the limits of prediction. *Global Change Biology*,  
582 **2019**,1-10.
- 583 Parmesan, C. (2006) Ecological and Evolutionary Responses to  
584 Recent Climate Change. *Annual Review of Ecology, Evolution,*  
585 *and Systematics*, **37**, 637-669.
- 586 Parmesan, C., Ryrholm, N., Stefanescu, C., Hill, J.K., Thomas,  
587 C.D., Descimon, H., Huntley, B., Kaila, L., Kullberg, J.,  
588 Tammaru, T., Tennent, W.J., Thomas, J.A. & Warren, M. (1999)  
589 Poleward shifts in geographical ranges of butterfly species  
590 associated with regional warming. *Nature*, **339**, 579-583.
- 591 Pateman, R.M., Hill, J.K., Roy, D.B., Fox, R. & Thomas, C.D.  
592 (2012) Temperature-Dependent Alterations in Host Use Drive  
593 Rapid Range Expansion in a Butterfly. *Science*, **336**, 1028-1030.  
594
- 595 Powell, J.A., Russell, P., Russell, S. & Sperling, F.A.H. (2000)  
596 Northward expansion of two mint-feeding species of *Pyrausta* in  
597 California (Lepidoptera: Pyraloidea: Crambidae). *Holarctic*  
598 *Lepidoptera*, **7**, 55-58.
- 599 R Development Core Team. (2013) R: A language and  
600 environment for statistical computing. R Foundation for Statistical  
601 Computing, Vienna, Austria. [WWW document]. URL  
602 <http://www.R-project.org/> [accessed on 1 August 2019].
- 603 RColorBrewer, S., Liaw, M.A. (2018) randomForest: Breiman  
604 and Cutler's Random Forests for Classification and Regression. *R*  
605 *package version 4.6-14*.  
606
- 607 Raffa, K.F., Powell, E.N. & Townsend, P.A. (2013) Temperature-  
608 driven range expansion of an irruptive insect heightened by  
609 weakly coevolved plant defenses. *Proceedings of the National*  
610 *Academy of Sciences*, **110**, 2193-2198.
- 611 Rodriguez, V.A., Belaich, M.N., Gomez, D.L.M., Sciocco-Cap,  
612 A. & Ghiringhelli, P.D. (2011) Identification of  
613 nucleopolyhedrovirus that infect Nymphalid butterflies *Agraulis*  
614 *vanillae* and *Dione juno*. *Journal of Invertebrate Pathology*, **106**,  
615 255-262.
- 616 Runquist, E.B., Forister, M.L. & Shapiro, A.M. (2012)  
617 Phylogeography at large spatial scales: incongruent patterns of  
618 population structure and demography of Pan-American butterflies  
619 associated with weedy habitats. *Journal of Biogeography*, **39**,  
620 382-396.

24 Christopher A. Halsch et al.

- 621 Salcido, D. M., Forister, M., Lopez, H. G. & Dyer, L. A. (2019)  
622 Ecosystem services at risk from declining taxonomic and  
623 interaction diversity in a tropical forest. *bioRxiv*, 631028.
- 624 Sanchez-Bayo, F. & Wyckhuys, K.A.G. (2019) Worldwide  
625 decline of the entomofauna: A review of its drivers. *Biological*  
626 *Conservation*, **232**, 8-27.
- 627 Scott, J.A. **1986**. The butterflies of North America: A natural  
628 history and field guide.
- 629 Shapiro, A.M. (2009) The Neo-Riparian butterfly fauna of  
630 western Argentina. *Journal of Research on the Lepidoptera*, **41**,  
631 24-30.
- 632  
633 Shapiro, A.M. & Manolis, T.D. (2007) Field Guide to Butterflies  
634 of the San Francisco Bay and Sacramento Valley Regions.
- 635 Sibly, R.M. & Hone, J. (2002) Population growth rate and its  
636 determinants: an overview. *Philosophical Transactions of the*  
637 *Royal Society B*, **357**, 1153-1170.
- 638  
639 Sourakay, A. (2008) Notes on the biology of the gulf fritillary  
640 *Agraulis vanillae* (Lepidoptera: Nymphalidae), in North-Central  
641 Florida. *Journal of the Lepidopterists' Society*, **63**, 127.
- 642  
643 Stireman III, J.O., Dyer, L.A., Janzen, D.H., Singer, M.S., Lill,  
644 J.T., Marquis, R.J., Ricklefs, R.E., Gentry, G.L., Hallwachs, W.,  
645 Coley, P.D., Barone, J.A., Greeney, H.F., Connahs, H., Barbosa,  
646 P., Morais, H.C. & Diniz, I.R. (2005) Climatic unpredictability  
647 and parasitism of caterpillars: Implications of global warming.  
648 *Proceedings of the National Academy of Sciences*, **102**, 17384-  
649 17387.
- 650  
651 Streifel, M.A., Tobin, P.C., Kees, A.M. & Aukema, B.H. (2019).  
652 Range expansion of *Lymantria dispar dispar* (L.) (Lepidoptera:  
653 Erebiidae) along its north-western margin in North America  
654 despite low predicted climatic suitability. *Journal of*  
655 *Biogeography*, **46**, 58-69.
- 656  
657 Thorne, J.H., Boynton, R.M., Flint, L.E. & A.L. Flint (2015)  
658 Comparing historic and future climate and hydrology for  
659 California's watersheds using the Basin Characterization  
660 Model. *Ecosphere* 6(2). Online.
- 661  
662 Walker, T.J. (1991) Butterfly migration from and to peninsular  
663 Florida. *Ecological Entomology*, **16**, 241-252.
- 664  
665 Warren, M.S., Hill, J.K., Thomas, J.A., Asher, J., Fox, R.,  
666 Huntley, B., Roy, D.B., Telfer, M.G., Jeffcoate, S., Harding, P.,  
667 Willis, S.G., Greatorex-Davies, J.N., Moss, D., Thomas, C.D.



- 668 (2001) Rapid responses of British butterflies to opposing forces of  
669 climate and habitat change. *Nature*, **414**. 65-69.  
670  
671 Wepprich, T., Adrion, J.R., Ries, L., Wiedmann, J. & Haddad,  
672 N.M. (2019) Butterfly abundance declines over 20 years of  
673 systematic monitoring in Ohio, USA. *Plos ONE*, **14**, e0216270.  
674

26 Christopher A. Halsch et al.

675 Figure 1. (a) Change in detection probability (the ratio of days  
676 observed to total visits) over time across all sites. (b) Annual ratio  
677 of urban land cover to total land cover at a county level for the  
678 three counties containing long-term study sites: North Sacramento  
679 and Rancho Cordova are in Sacramento County; Suisun Marsh  
680 and Gates Canyon are in Solano County. (c) Mean monthly  
681 maximum winter temperature over time.

682 Figure 2. (a) Variable importance of model covariates in  
683 predicting the presence of *A. vanillae* at a site in the Sacramento  
684 Valley over time. (b) Variable importance of model covariates in  
685 predicting the annual population growth after establishment.

686 Figure 3. Bayesian posterior distributions for important  
687 coefficients (as determined by random forest). Y-axis shows  
688 scaled coefficient estimates. (a) Estimates of coefficients for  
689 establishment. (b) Estimates of coefficients for population growth.

690 Figure 4. The expanding gulf fitness landscape. (a) Current  
691 distribution of suitability for *Passiflora*. (b) 2050 distribution of  
692 suitability for *Passiflora* under RCP 4.5. (c) Current distribution  
693 of suitability for overwintering *A. vanillae*. (d) 2050 distribution  
694 of suitability for overwintering *A. vanillae* under RCP 4.5. (e)  
695 Current distribution of suitability for dispersal *A. vanillae*. (f)  
696 2050 distribution of suitability for dispersal *A. vanillae* under RCP  
697 4.5.

Table 1. Variable importance and model fit of all species distribution models. Rows represent different regional models and columns are the different variables in the model. AUC (area under the curve) is the performance metric of model fit.

|               |          | Temperature | Population | Precipitation | AUC   | OR    | <i>P</i> -value |
|---------------|----------|-------------|------------|---------------|-------|-------|-----------------|
| Host plant    | Combined | 48.8        | 41.5       | 9.7           | 0.915 | 0.127 | <b>0.013</b>    |
|               | East     | 53.9        | 39.9       | 6.2           | 0.891 | 0.115 | <b>0.004</b>    |
|               | West     | 12.5        | 79.9       | 7.8           | 0.983 | 0.167 | <b>0.020</b>    |
| Overwintering | Combined | 29.0        | 71.0       | N/A           | 0.979 | 0.112 | <b>0.024</b>    |
|               | East     | 30.5        | 69.5       | N/A           | 0.978 | 0.067 | <b>0.026</b>    |
|               | West     | 17.8        | 82.2       | N/A           | 0.992 | 0.200 | <b>0.047</b>    |
| Dispersal     | Combined | 1.8         | 98.2       | N/A           | 0.925 | 0.113 | <b>0.030</b>    |
|               | East     | 7.3         | 92.7       | N/A           | 0.925 | 0.066 | <b>0.025</b>    |
|               | West     | 4.9         | 95.1       | N/A           | 0.985 | 0.061 | 0.057           |

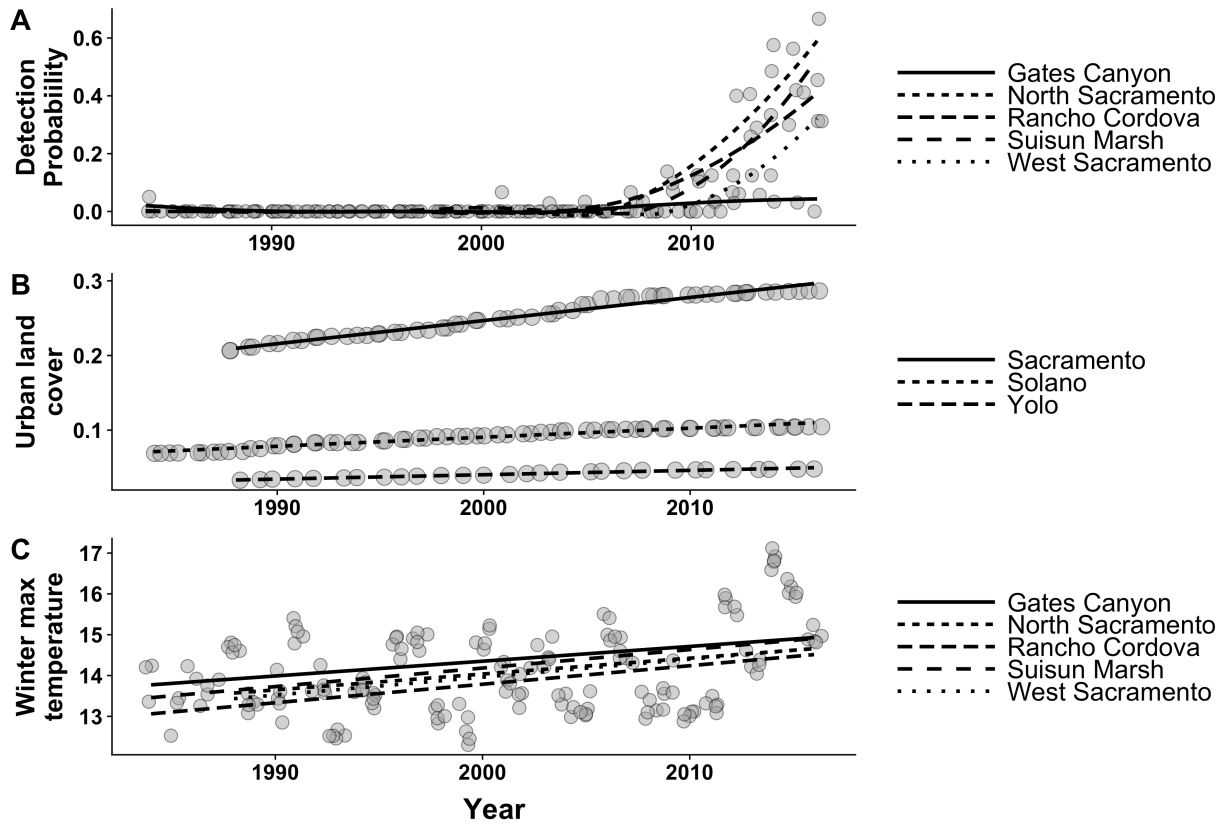

Figure 1

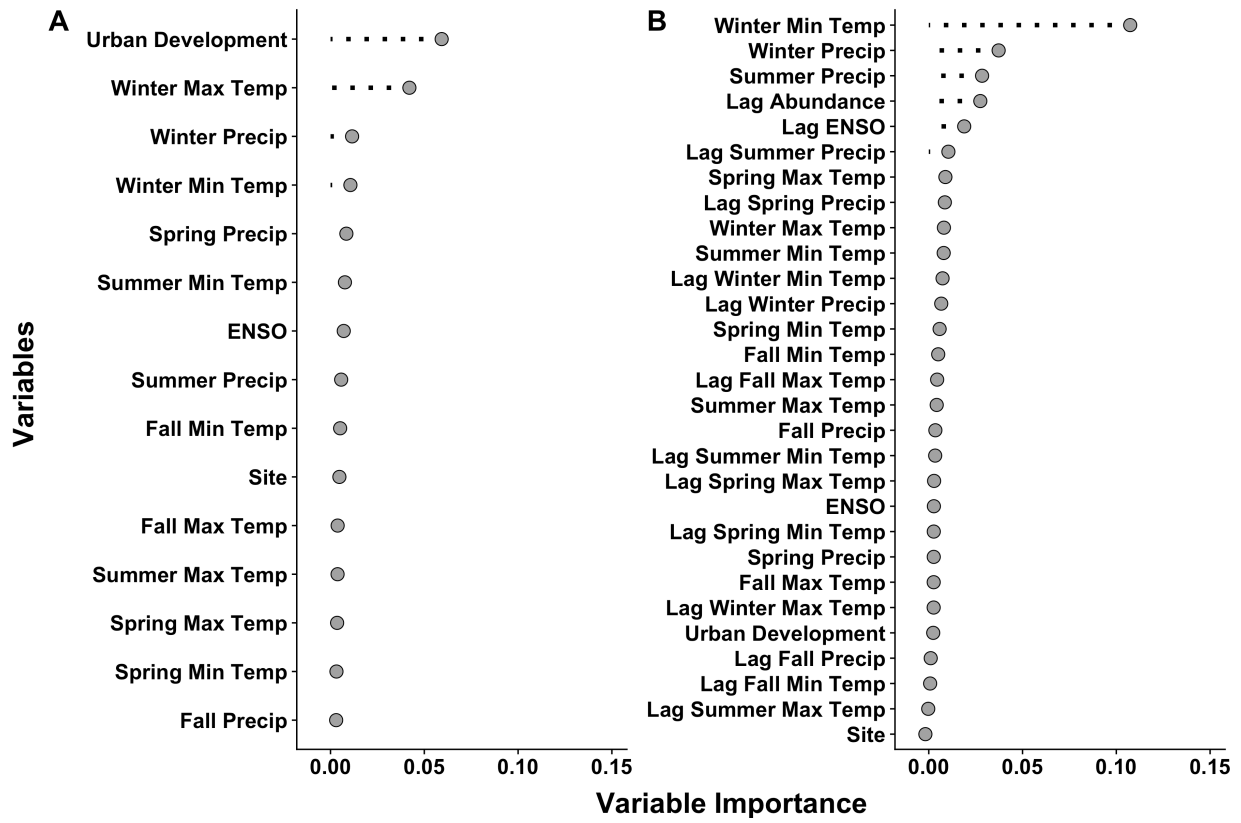

Figure 2

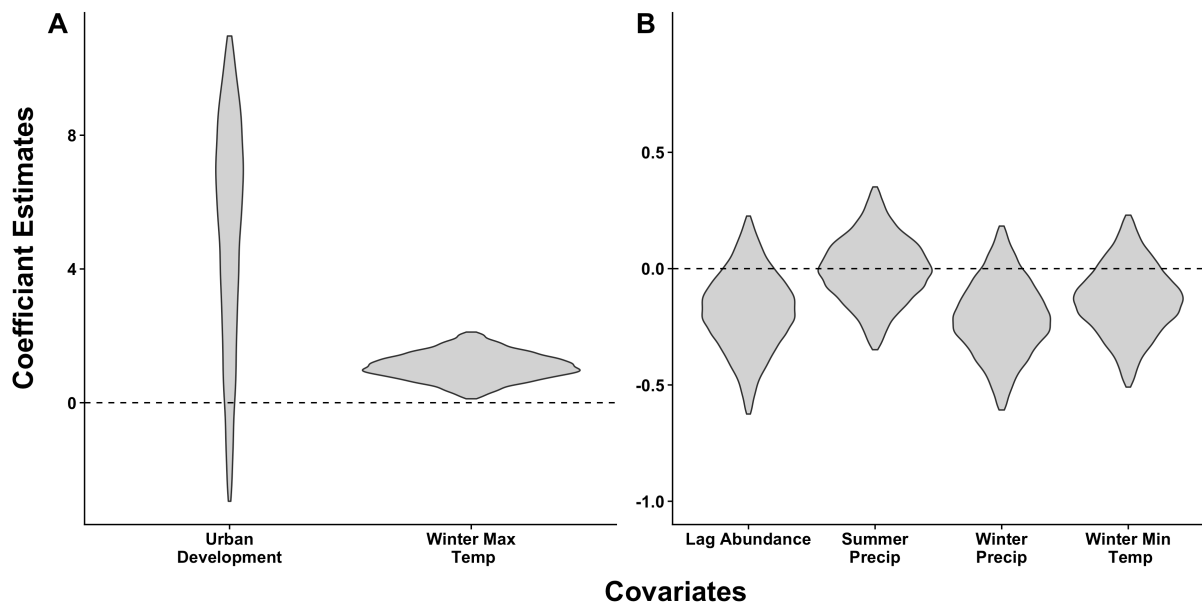

Figure 3

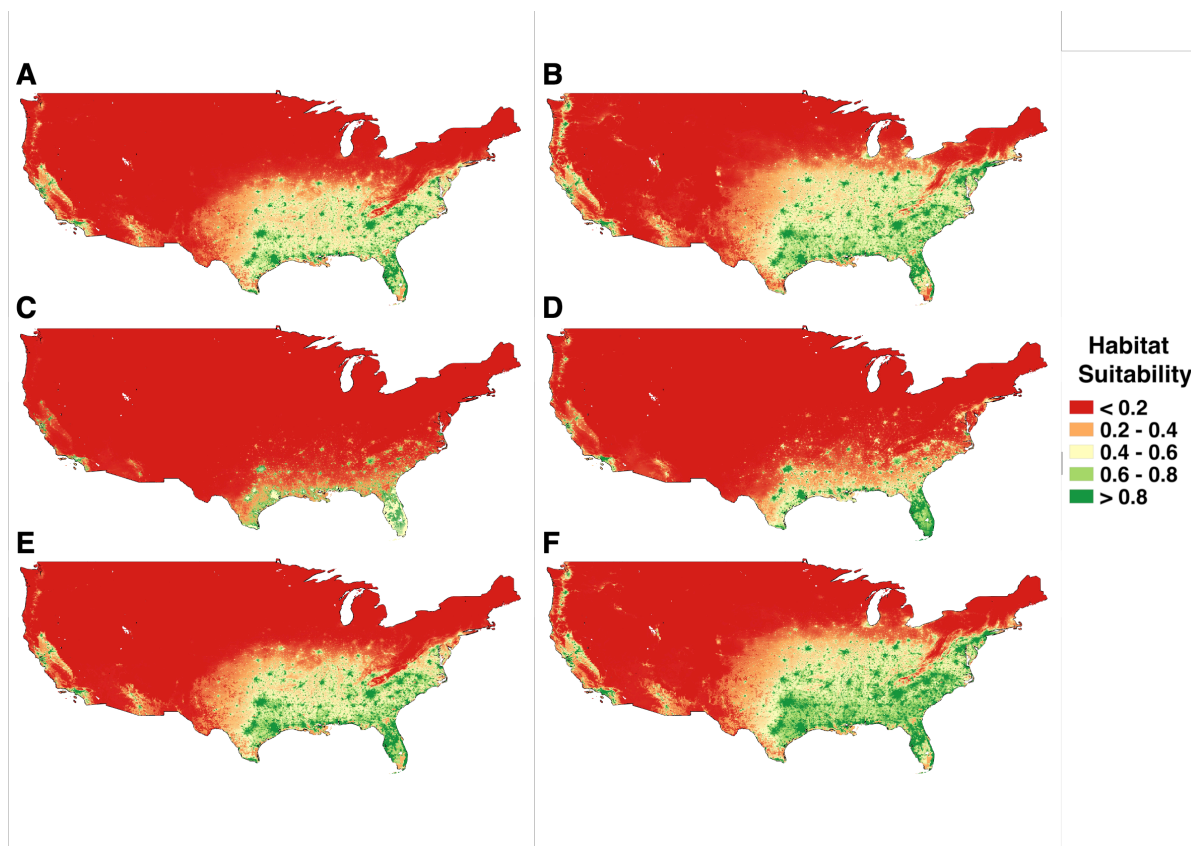

**Figure 4**
